# Supplementary material
Source: PubMed Central journal article supplement (PMC6056589)

eFigure 1

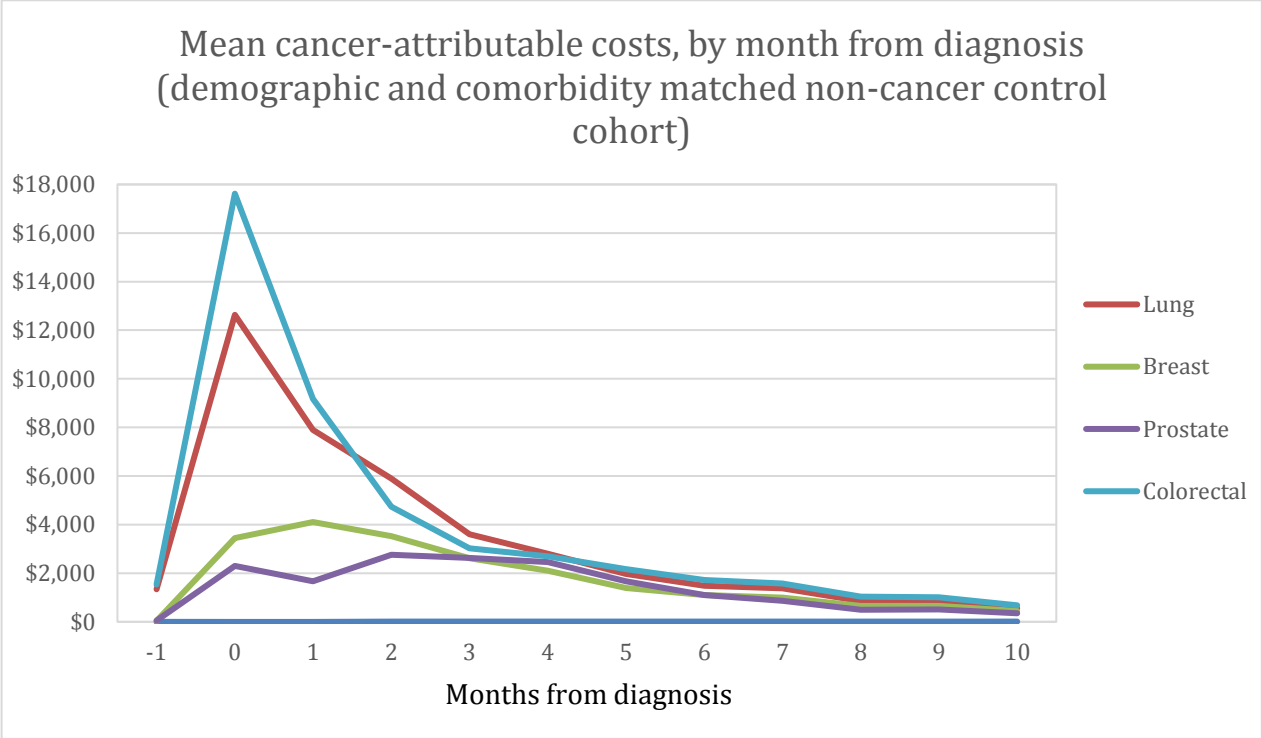

Supplement: HESR-53-3227-s002.pdf [file HESR-53-3227-s002.pdf]
